# Supplementary material for: Neddylation of EphB1 Regulates Its Activity and Associates with Liver Fibrosis
Source: MDPI journal article supplement (doi:10.3390/ijms24043415), 2023-02-08
Supplement: s1 [file s1]

**Table S1.** List of all primers used in this study.

| <b>Genes name</b>     | <b>Forward Primers</b>       | <b>Reverse Primers</b>        |
|-----------------------|------------------------------|-------------------------------|
| EphB1 (human)         | 5'-TGTGAGATGGACAGCTCCAGAG-3' | 5'-TGCCACAGTCTTGAGACTTGCC-3'  |
| $\alpha$ -SMA (human) | 5'-GGGAATGGGACAAAAAGACA-3'   | 5'-GGGAATGGGACAAAAAGACA-3'    |
| COL1A1 (human)        | 5'-CTTCAGGGGCAACACGAA-3'     | 5'-GGAACACCTCGCTCTCCA-3'      |
| MMP-2(human)          | 5'-GTATTTGATGGCATCGCTCA-3'   | 5'-CATTCCTGCAAAGAACACA-3'     |
| TIMP2(human)          | 5'-GTCACAGAGAAGAACATCAACG-3' | 5'-GATGTCGAGAAACTCCTGCTT-3'   |
| GAPDH(human)          | 5'-GGAGCGAGATCCCTCCAAAAT-3'  | 5'-GGCTGTTGTCATACTTCTCATGG-3' |
| EphB1 (rat)           | 5'-CTTTGGCCTCTCTCGCTACC-3'   | 5'-ATCGCTGGCTGACGTAAACT-3'    |
| $\alpha$ -SMA (rat)   | 5'-TGTGCTGGACTCTGGAGATG-3'   | 5'-GAAGGAATAGCCACGCTCAG-3'    |
| COL1A1 (rat)          | 5'-ATGTTCACTTTGTGGACCT-3'    | 5'-CAGCTGACTTCAGGGATGT-3'     |
| MMP-2(rat)            | 5'-GTGACGGCTTCCTCTGGTGTTC-3' | 5'-CAGGGCTGTCCATCTCCATTGC-3'  |
| TIMP2(rat)            | 5'-TGATGCTAAGCGTGTCCCAG-3'   | 5'-GCTGGACGTTGGAGGAAAGA-3'    |
| GAPDH(rat)            | 5'-GAACCTGCCGTGGGTAGAG-3'    | 5'-AGGTCGGTGTGAACGGATTTG-3'   |
